# Supplementary material for: Airway hyperresponsiveness is associated with airway remodeling but not inflammation in aging Cav1 -/- mice
Source: Springer Nature journal article supplement (doi:10.1186/1465-9921-14-110), 2013-10-21

**A**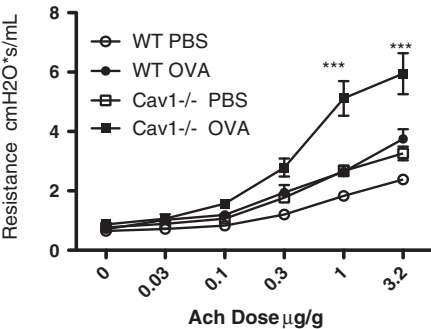**B**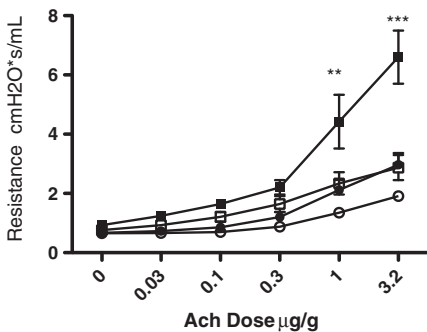**C**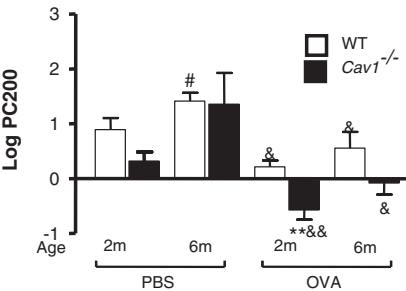**D**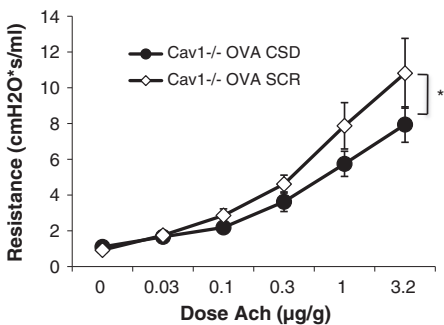

Supplement: 12931_2013_1420_MOESM4_ESM.pdf [file 12931_2013_1420_MOESM4_ESM.pdf]
